# Supplementary material for: Are Minority Forest Farmers Willing to Participate in Forest Man-Agement? Evidence from the Minority Regions of Southwest China
Source: Preprints.org preprint supplement (doi:10.20944/preprints202306.0151.v1), 2023-06-02
Supplement: Supplementary file 1 [file supplementary]

**Response to academic editor's comments**

Thank you for your careful comments. We really appreciate your efforts in reviewing our manuscript during this unprecedented and challenging time. We wish good health to you, your family, and community. Your careful review has helped to make our study clearer and more comprehensive, and our point-by-point responses are presented following. The responses to your comments are marked in red and presented following.

Point 1: The problem described is mainly local, and its interest could be reduced to potential readers from other countries.

Response 1: Thank you for your comment, and our reply is as follows:（1）In the "Introduction" section, the ecological background, the importance of forest resources, the background of China's collective forest tenure system reform and development results are added, and the research focus of foreign scholars and the combing of relevant references are added. At the same time, in the last paragraph of the "Introduction", the forest ecological situation and status of Yunnan Province are emphasized, and as a community of ecological destiny and ecological interests with the people of South Asia and Southeast Asia, it actively exchanges experience with some developing countries in the Lancang-Mekong Basin through forest resource management, forestry poverty alleviation and poverty reduction, which shows the international status and influence of Yunnan Province. It also highlights the typical and representative research points of this paper, and describes the research content, purpose and significance, necessity and importance of research.

(2) The framework and content of the full-text writing have been extensively revised, and the "Data Source" section details the time, content, method of investigation, and number of personnel of the field survey. The "Variable Selection" section reorganizes the relevant contents of the SLA framework, as well as the criteria and basis for variable allocation. The "Research Methods" section provides a detailed description of the methodological formula, adding evidence of the model evaluation results. Rewritten "4. Discuss the logical framework and ideas of the "section, and explain the research results based on the SLA model. Finally, in "5. Conclusion" partially summarizes the forest land management behavior and willingness of ethnic minority farmers, and puts forward relevant countermeasures and suggestions.

Point 2: The methodologies (SLA) are poorly founded (no JCR paper or book chapter).

Response 2: Thank you for underlining this deficiency. In the section "2.3 Variable Selection", the theoretical development background and main research areas of the Sustainable Livelihood Framework (SLA) are enriched, and the reasons and applicability of SLA framework are explained. This paper supplements and sorts out the research background of scholars on this theoretical framework, the division of variables and the application of research theory. Added some references on the SLA framework, detailing the 5 aspects of the framework, it also explains the basis and criteria for the division of relevant variables in the questionnaire in this article. Based on the thinking of farmers in ethnic minority areas, three types of variables were finally divided, (1) Variables related to the individual, social and economic attributes of farmers; (2) variables related to farmers' cognition and their own experiences; (3) variables related to policy guidance.

Point 3: It is not acceptable in a scientific Journal to provide links to bibliographic references non included on WOS using problematic repositories such as "sci-hub". Besides, a lot of links do not work.

Response 3: We agree with your comment. Based on your suggestions, we have reorganized the format of references in scientific journals and standardized the way of citation. The correct links to bibliographies or journals contained in WOS have been provided and adapted and modified in the correct format.
